# Supplementary material
Source: MDPI journal article supplement (https://www.mdpi.com/2076-3298/2/2/200)
Supplement: s1 [file s1]

*Supplementary Information*

**Landscape Disturbance from Unconventional and Conventional Oil and Gas Development in the Marcellus Region of Pennsylvania, USA**

The Supplemental Information includes separate overviews of unconventional, coal-bed methane and conventional oil and gas development. Further details on the spatial datasets acquired for Pennsylvania, dasymetric population analysis and morphological spatial pattern analysis (MSPA) of forests follow the oil and gas development overviews. As complements to Figures 1 and 2 in the main text, Figure S2 shows a more precise distribution of unconventional and conventional oil and gas development sites, and Figure S3 shows the proximity of unconventional and conventional oil and gas development to impaired streams.

1. Overview of Unconventional Oil and Gas Development in Pennsylvania

A permit from the Pennsylvania Department of Environmental Protection (PADEP) must be received before oil and gas development can begin. The permit application must show the location of the well and its proximity to coal seams, water bodies and water supplies. Once a permit is cleared and a bond is posted, the operator begins by cutting an access road and then clearing and leveling the site. The site is often referred to as a well pad. A vertical wellbore is then drilled to the depth of the shale seam, which is between 1524 m (5000 ft) and 2439 m (8000 ft). Shale gas can be retrieved from the vertical wellbore, but the economic advantage is realized by turning it up to 90 degrees to extend the reach of the well horizontally up to a distance of ~915 m (3000 ft). At predetermined locations along its horizontal extent, the drill casing is perforated, and it is at the perforations where the mixture of water, sand and chemicals is forced down the wellbore, through the perforations and into the shale in order to fracture the rock and allow the trapped gas and liquids to be extracted back through the “piping.” There may be up to 15 perforations per well. More in-depth descriptions of the process of shale gas extraction in the Marcellus region can be found in [1,2].

In Pennsylvania, the mixture most often forced through the perforations is referred to as “slickwater,” which is water with some sand and chemical additives pumped at high pressure. Each perforation may require 500,000 to 1,000,000 gallons of slickwater [2], and each well may need to 2,000,000 to 10,000,000 gallons of slickwater to extract the trapped gasses and liquids [1]. While the volumes of water seem very large, fracking is ranked ninth for water use in Pennsylvania, far behind other industrial sectors, such as electric and nuclear power generation [3]. The water returned in the process of extracting the trapped gas and liquids is referred to as flowback or produced water [4–6]. The flowback period commences once the hydraulic fracturing (injection of slickwater) is completed, lasts approximately two weeks and returns ~10% to ~40% of the slickwater used [5]. The water that returns to the surface once gas production commences is referred to as produced and is typically a much smaller volume [5]. Both are often referred to as wastewater, which is the term we used throughout the main text.

The footprint of a shale gas extraction site includes a well pad, an access road, pipelines to transmit the extracted gas and liquids, land to store equipment and detention ponds to store water used to extract the trapped gas and liquids (e.g., slickwater) and the water returned through the extraction process (*i.e.*, flowback and produced). Johnson [7] mapped the location of 242 sites in Pennsylvania and found that the average area gas extraction site was ~3.65 ha (~9 acres), of which only one-third was the well pad itself. Another important characteristic of shale gas extraction is that there tends to be more than one well per well pad. Johnson [7] also reported that there were ~2 wells per well pad for the sites that they mapped and projected that 7000 to 16,000 well pads would be constructed by 2030. The number of wells per well pad is an important determinant of the cumulative footprint of all sites across a given region

2. Overview of Conventional Oil and Gas Development

Simply put, the term conventional means that oil and gas are brought to the surface by the pressure released from inserting the well into the formation [4]. The formations holding conventional oil and gas resources tend to be permeable: hydrocarbons migrate freely through the formation toward the well, whereas unconventional resources in the Marcellus (and elsewhere) tend to be much less permeable and, hence, require hydraulic fracturing to release the trapped oil and gas resources [2].

3. Overview of Coal-Bed Methane Development

Methane and sometimes other hydrocarbons are brought to the surface by pumping water from the coal deposits. Pumping the water from the coal seams results in a drop in pressure, which forces the methane to be desorbed from the coal and rise to the surface [8,9].

4. Data Descriptions

We used several GIS datasets that were developed exclusively for the state of Pennsylvania. Below are descriptions of these datasets from the website (http://www.pasda.psu.edu) from which they
were downloaded.

4.1. Title: Wilderness Trout Streams

Originator: Pennsylvania Fish and Boat Commission

Publication Date: January 2014

Abstract: This layer contains flowing waters from the Pennsylvania Fish and Boat Commission (PFBC) Fisheries Resource Database that are under the wilderness trout designation. Wilderness trout stream management is based on the provision of a wild trout fishing experience in a remote, natural and unspoiled environment where man’s disruptive activities are minimized. Established in 1969, this option was designed to protect and promote native (brook trout) fisheries, the ecological requirements necessary for natural reproduction of trout and wilderness aesthetics. The superior quality of these watersheds is considered an important part of the overall angling experience on wilderness trout streams. Therefore, all stream sections included in this program qualify for the exceptional value (EV) special protected water use classification, which represents the highest protection status provided by the Department of Environmental Protection (DEP). This dataset was created by loading both river mile values and latitude/longitude coordinates of section limits existing in the PFBC Fisheries database. The locational values were originally derived from a variety of sources, including GPS, scaling from USGS maps and aerial photography. Tools in ArcMap were used to generate the stream sections from these values. Each section was checked against the descriptions contained for each upstream and downstream section limit, and the sections were adjusted where necessary. The current 1:24,000 National Hydrography Dataset (NHD) flowing waters layer was used as the base for drawing the sections, and these data are coincident with NHD.

4.2. Title: Class A Wild Trout Streams

Originator: Pennsylvania Fish and Boat Commission

Publication Date: January 2014

Abstract: Class A streams are streams that support a population of wild (natural reproduction) trout of sufficient size and abundance to support a long-term and rewarding sport fishery. The Commission does not stock these streams. This GIS layer represents the sections of streams that are designated as such. This dataset was created by loading both river mile values and latitude/longitude coordinates of section limits existing in the PFBC Fisheries database. The locational values were originally derived from a variety of sources, including GPS, scaling from USGS maps and aerial photography. Tools in ArcMap were used to generate the stream sections from these values. Each section was checked against the descriptions contained for each upstream and downstream section limit, and the sections were adjusted where necessary. The current 1:24,000 National Hydrography Dataset (NHD) flowing waters layer was used as the base for drawing the sections, and these data are coincident with NHD.

4.3. Title: Environmental Justice Areas

Originator: PADEP Geospatial Data Center

Publication Date: 16 March 2012

Abstract: This layer identifies 2010 Pennsylvania Census Tracts, which meet the PADEP definition for environmental justice areas by having a poverty rate of 20% or greater or a non-white population of 30% or greater. Percentages were rounded up based on a decimal value of 0.5 or greater for the purposes of creating this layer. Census tracts are small, relatively permanent statistical subdivisions of a county delineated by local participants as part of the U.S. Census Bureau’s Participant Statistical Areas Program. The U.S. Census Bureau delineated census tracts in situations where no local participant existed or where local or tribal governments declined to participate. The primary purpose of census tracts is to provide a stable set of geographic units for the presentation of decennial census data. Census tract polygons were joined with Census population data and Census poverty data to produce this layer for the PA Department of Environmental Protection. Specifically, an environmental justice area is defined as a Census tract area that has 20% or more of the population in poverty or 30% or more of the population is non-white.

4.4. Title: Boundaries of Exceptional Value Watersheds

Originator: Environmental Resources Research Institute

Publication Date: 1996

Abstract: Watersheds of exceptional quality streams. Exceptional value (EVAL) watersheds are published in1996 by the PADEP and are based on stream surveys conducted by the Environmental Resources Research Institute, Law Environmental Incorporated and define high quality streams based on chemical, biological and recreational criteria such as supporting high quality aquatic life, limited amounts of metal contamination, pH, dissolved oxygen and temperature. Statewide, these 116 named watersheds range in size from 1.3-km2 to 92.55-km2 and tend to occur in the headwaters portion of HUC-12 digit watersheds. Specific criteria and testing methods can be found in: 25 Pa. Code § 94.4b: (<http://www.pacode.com/secure/data/025/chapter93/s93.4b.html>).

5. Dasymetric Analysis

Dasymetric mapping is a procedure used to create a statistical surface from data collected for larger spatial units. We used the dasymetric procedures described in Mennis and Hultgren [10] to distribute 2010 Census block population estimates to NLCD pixels, using the NLCD 2006 (Version 2) and the 30-m National Elevation Dataset (http://www.usgs.gov) to guide the redistribution. The re-distribution required four steps.

5.1. Step 1

The NLCD Level II land cover was re-classified so that the redistribution was weighted toward the four urban land cover classes [11]. Of the remaining classes, water, ice, barren and wetland were assigned weights of zero, so that people were not allowed to occupy pixels with these land-cover labels, and the upland vegetation and agricultural classes were assigned small weights to capture the rural residential population.

5.2. Step 2

NLCD mapping methods are designed to capture the road network (Homer *et al*. 2004), and the roads are classified as one of the four urban classes [12]. We used GIS routines to reduce the road width to one pixel (as best as possible) in order to reduce the likelihood of assigning a population estimate > 0 to roads. Further, all locations whose slope was greater than 25% were assigned a weight of zero, so that pixels on steep slopes were assigned a population estimate of zero.

5.3. Step3

All census blocks with homogenous urban land cover were compared to their census block population estimates to establish weights (densities) for the four urban classes for use in census blocks that were not a homogeneous urban class.

5.4. Step 4

The densities established in Step 3 were used to distribute the population is census blocks with more than one land cover class. A density value of 0.001 (~1 person/km2) was assigned to the upland vegetation and agricultural classes. After completing these four steps, each NLCD pixel is assigned a population value based on the census block population estimate in which the pixel occurs. These
pixel-level population estimates were then summed for all pixels within the GIS buffer distance (see the Methods Section) to determine the population close to unconventional oil and gas exploration
sites only.

6. Morphological Spatial Pattern Analysis

Morphological spatial pattern analysis (MSPA) identifies structure based on a raster map of occurrence [13,14]. For the icon above, suppose that all of the colored cells are forest and all of the clear (blank) cells are non-forest. MSPA takes as input a binary map (e.g., forest, non-forest) and classifies the feature of interest (e.g., forest) as: (1) core (interior); (2) edge; (3) perforations, which are edge pixels in forest interior locations that separate interior forest from “holes” of non-forest in interior forest; (4) bridges (corridor), which are forest pixels connecting two disjunctive sections of interior;
(5) loops, which are linearly-oriented forest pixels that connect interior forest to itself; (6) branches, which are linearly-oriented forest pixels that extend from interior forest, but do not connect to another disjunctive section of interior forest; and; (7) islets (patch), which are forest pixels that are too small to be a core. In the icon above, core is green, edge is black, perforation is blue, bridge is red, loop is yellow, branch is orange and islet is brown. The MSPA software and supporting documentation are available at: http://forest.jrc.ec.europa.eu.

The main input parameters are edge width (in number of pixels) and connectivity rule (four- or eight-neighbor rule for defining adjacency between pixels). Edge width affects the classification result. For example, increasing the edge width by one pixel may change small areas of core to islet, which would also re-classify the edge surrounding the small areas of the core to islet. The connectivity rule also affects the classification result. For example, changing the connectivity rule from eight neighbor to four neighbor could re-classify a bridge to an edge if a portion of the bridge were adjacent to neighboring bridge pixels only at its corners. As stated in the main text, we used a 10-pixel edge width (100 m) and eight-neighbor connectivity to identify MSPA classes for maps with and without unconventional and conventional natural gas exploration sites.

The MSPA classification results indicate that gas exploration sites are often located at forest interior locations, because the largest per-class changes were for the perforation class. In other words, introduction of gas exploration is creating “holes” in interior forest and changing neighboring forest from interior to edge (perforated).


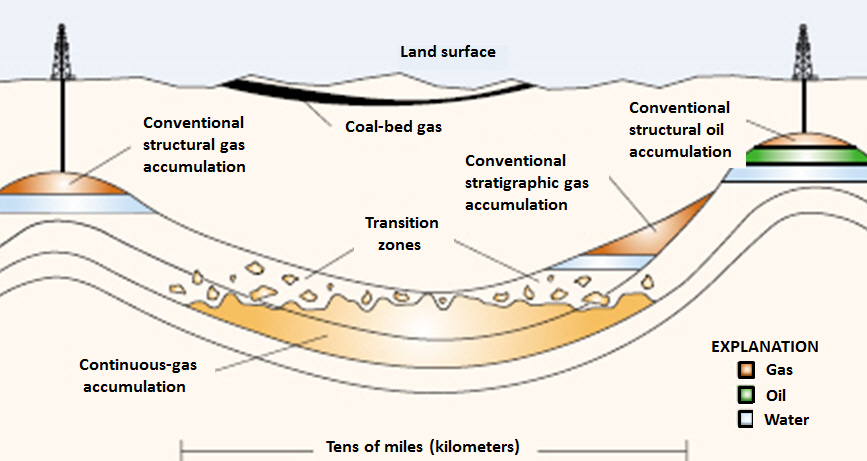


**Figure S1.** From USGS (2002) [15], showing a schematic of different types of oil and
gas development.

**Table S1.** Change in morphological spatial pattern analysis (MSPA) class distributions from the introduction of unconventional and conventional gas exploration. Cell values are the number of 10 m × 10 m pixels or percentages. Differences were calculated on a per-class basis ([[NLCDCOG-NLCD]/NLCD] × 100). The values in the difference columns for the total row are weighted averages. The number of pixels assigned to background (urban, agriculture) increases because gas exploration sites were coded as urban. Likewise, the number of pixels assigned to missing (shrubland, grassland, wetland, water) decreases because the embedded gas exploration sites can replace these classes.

| **Name** | **NLCD** | **NLCDCOG** | **Diff (%)** | **NLCDUOG** | **Diff (%)** | **NLCDCDUOG** | **Diff (%)** |
| --- | --- | --- | --- | --- | --- | --- | --- |
| background | 218,391,741 | 218,736,201 | 0.158 | 218,550,150 | 0.073 | 218,849,839 | 0.210 |
| branch | 19,778,031 | 19,738,148 | −0.202 | 19,786,396 | 0.042 | 19,744,584 | −0.169 |
| edge | 59,780,488 | 59,427,757 | −0.590 | 59,765,756 | −0.025 | 59,418,903 | −0.605 |
| perforation | 5,571,328 | 6,097,847 | 9.451 | 5,675,135 | 1.863 | 6,185,741 | 11.028 |
| islet | 7,964,163 | 7,989,416 | 0.317 | 7,972,009 | 0.099 | 7,992,389 | 0.354 |
| Core | 360,856,973 | 358,749,249 | −0.584 | 360,475,260 | −0.106 | 358,466,388 | −0.662 |
| bridge | 86,514,098 | 88,108,752 | 1.843 | 86,630,657 | 0.135 | 88,183,474 | 1.930 |
| loop | 29,634,276 | 29,654,863 | 0.069 | 29,646,032 | 0.040 | 29,668,615 | 0.116 |
| missing | 809,278,614 | 809,267,479 | −0.001 | 809,268,317 | −0.001 | 809,259,779 | −0.002 |
| Total | 1,597,769,712 | 1,597,769,712 | 0.314 | 1,597,769,712 | 0.051 | 1,597,769,712 | 0.351 |

Notes: NLCD—National Land Cover Dataset; NLCDCOG—National Land Cover Dataset Conventional Oil and Gas; NLCDUOG—National Land Cover Dataset Unconventional Oil and Gas; diff. (%)—percent difference.


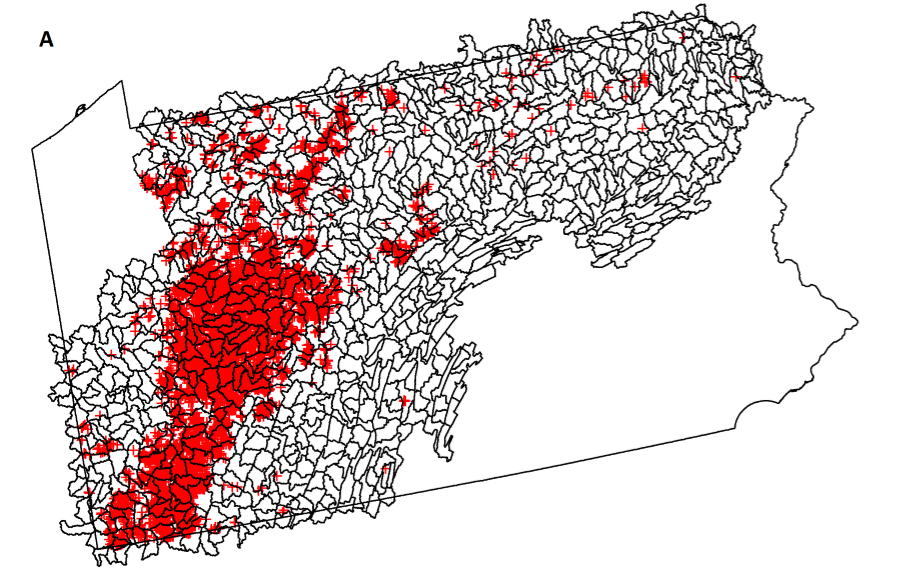


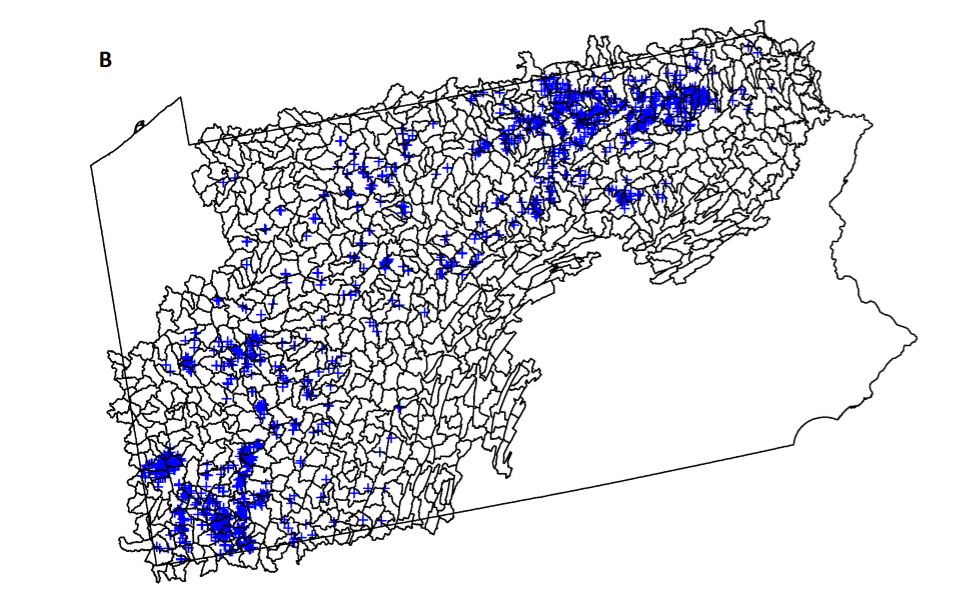


**Figure S2.** Location of conventional (**A**) and unconventional (**B**) oil and gas developments sites. Site are displayed as points.


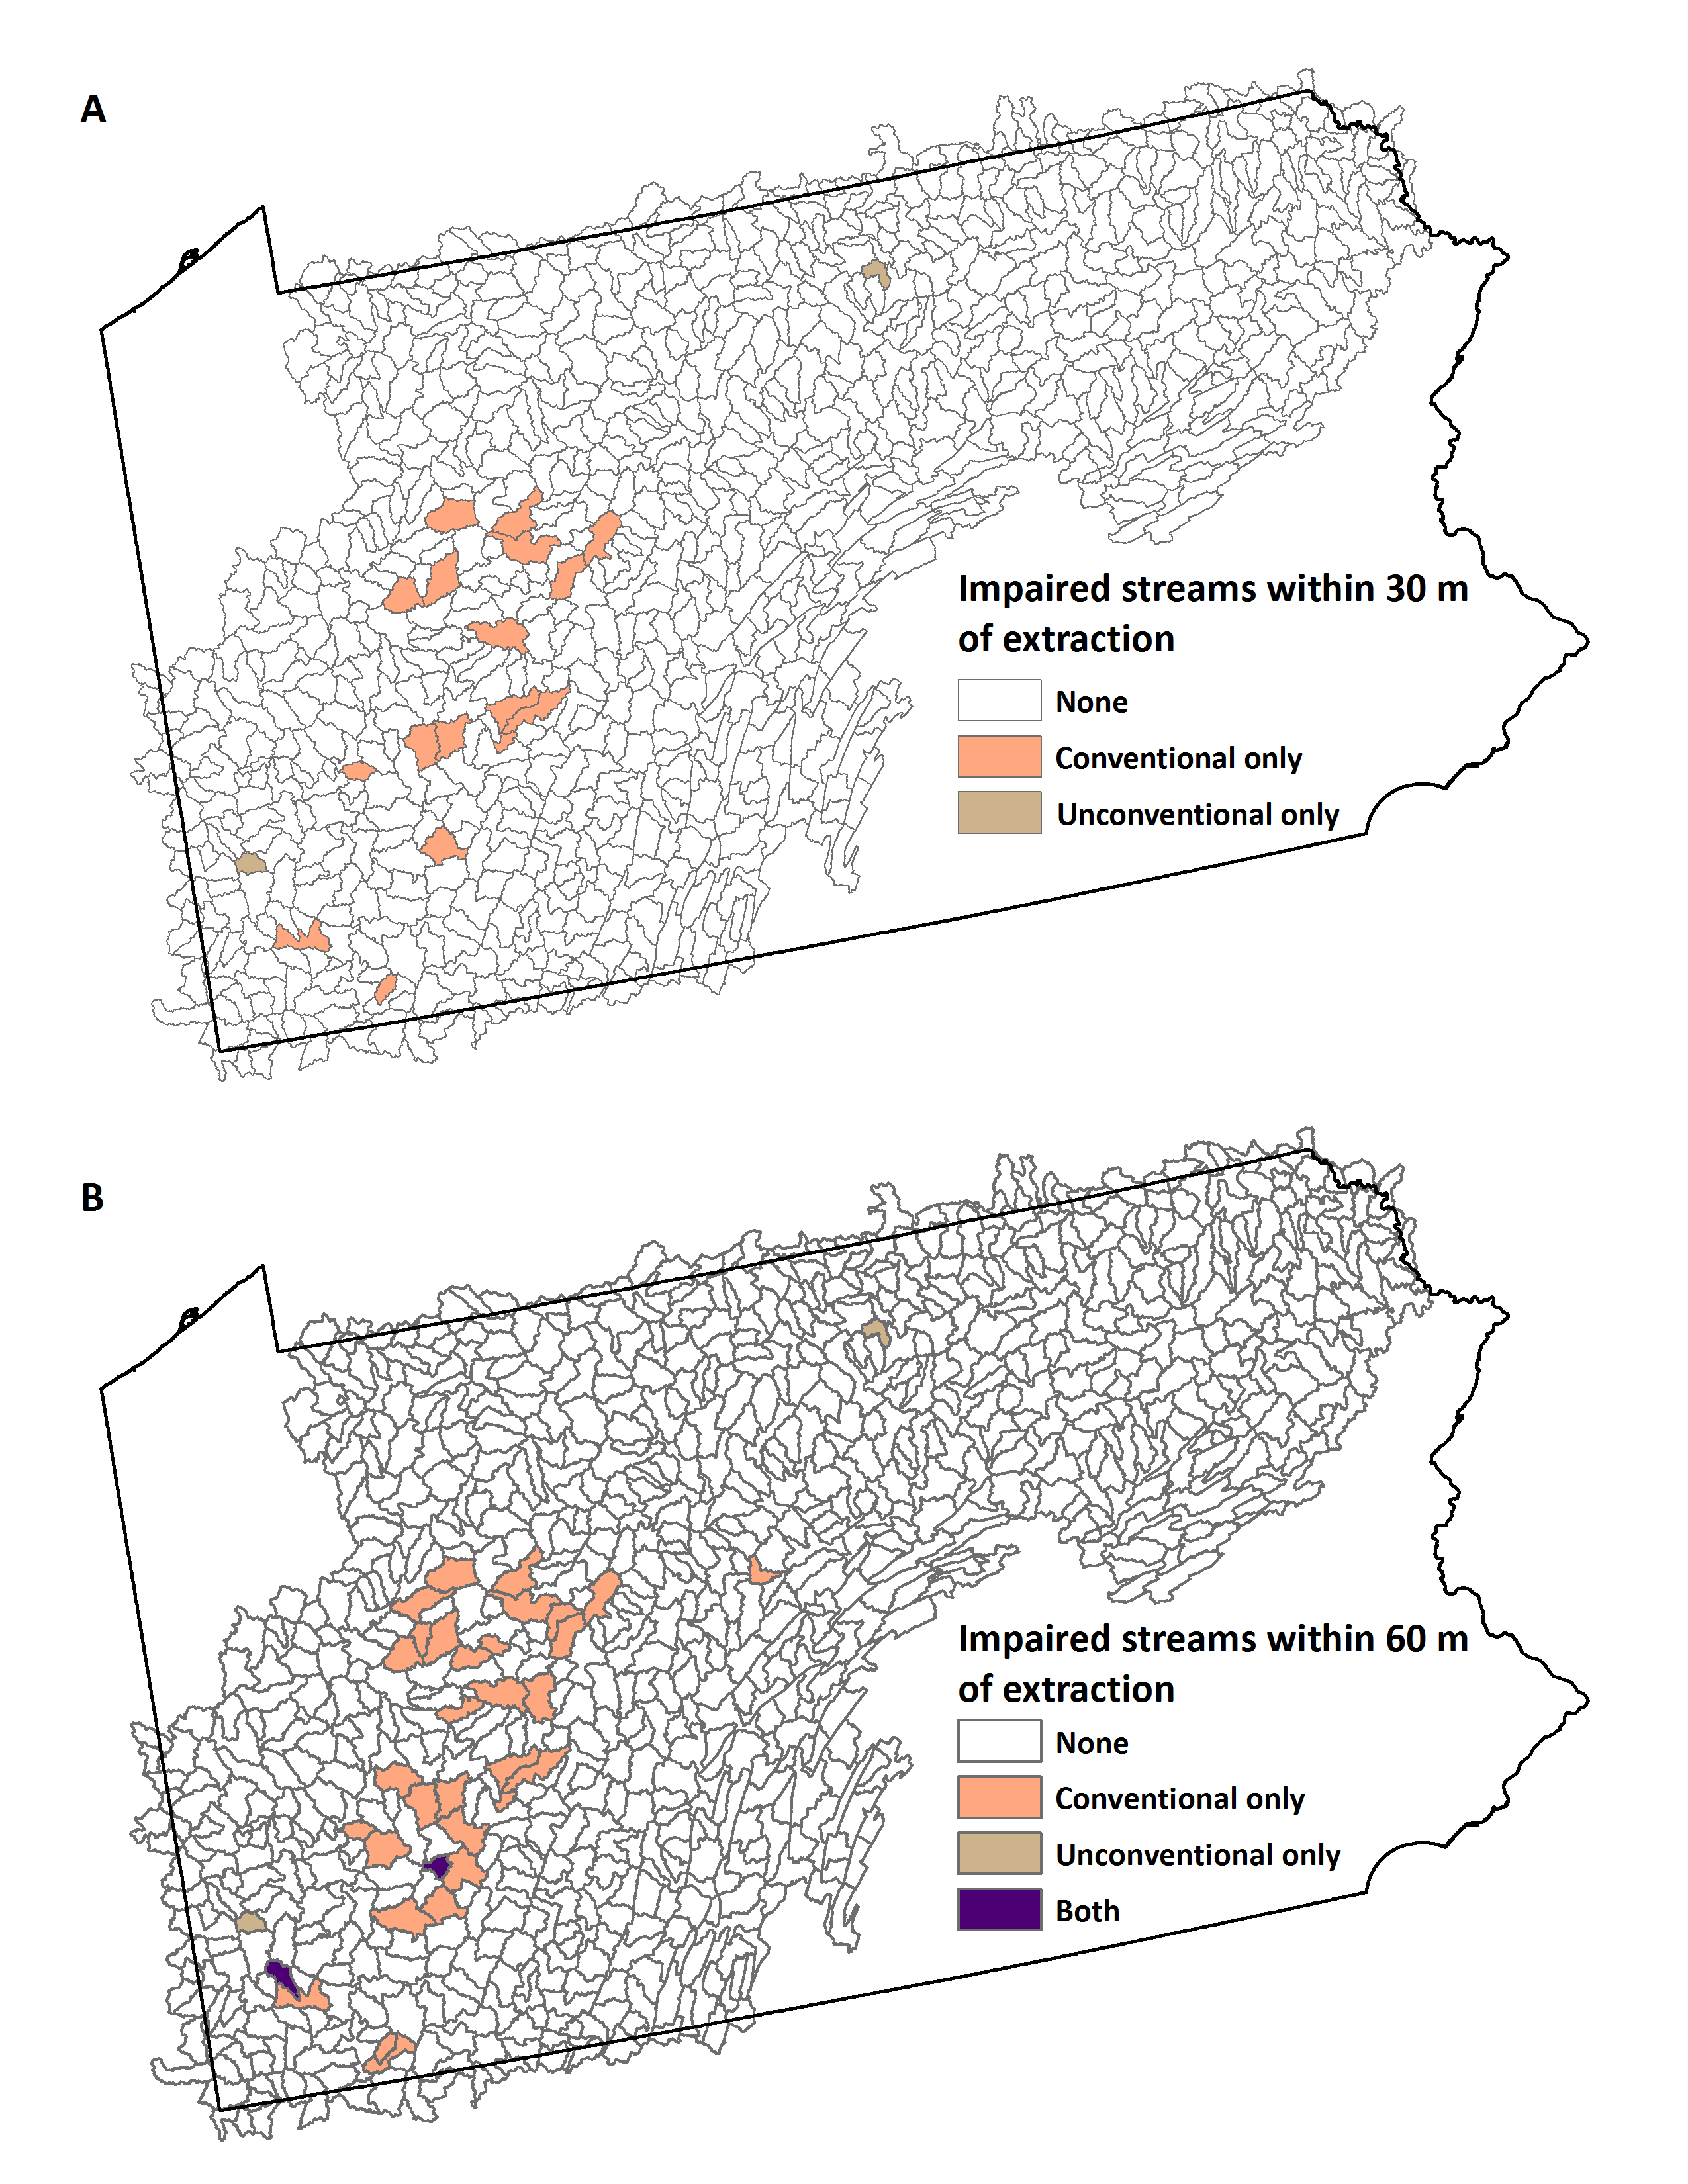


**Figure S3.** Watersheds with unconventional and conventional oil and gas development within 30 m (**A**) and 60 m (**B**) of streams identified as impaired under the Clean Water Act.

References

1. Kargbo, D.M.; Wilhelm, R.G.; Campbell, D.J. Natural gas plays in the Marcellus Shale: Challenges and potential opportunities. *Environ. Sci. Technol.* **2010**, *44*, 5679–5684.
2. Pennsylvania Department of Environmental Protection (PADEP). Hydraulic Fracturing Overview. Available online: http://files.dep.state.pa.us/OilGas/BOGM/BOGMPortalFiles/MarcellusShale/
   DEP%20Fracing%20overview.pdf. (accessed on 19 March 2015).
3. Governor’s Marcellus Shale Advisory Commission. *Governor’s Marcellus Shale Advisory Commission Report*; Pennsylvania Department of Environmental Protection: Harrisburg, PA, USA,2011. Available online: http://www.portal.state.pa.us/portal/server.pt/community/
   marcellus_shale_advisory_commission/20074 (accessed on 14 December 2014).
4. Barbot, E.; Vidic, N.; Gregory, K.; Vidic, R. Spatial and temporal correlation of water quality parameters of produced waters from Devonian-age shale following hydraulic fracturing. *Environ. Sci. Technol.* **2013**, *47*, 2562–2569.
5. Gregory, K.B.; Vidic, R.D.; Dzombak, D.A. Water management challenges associated with the production of shale gas by hydraulic fracturing. *Elements* **2011**, *7*, 181–186.
6. Vidic, R.; Brantley, S.; Vandenbossche, J.; Yoxtheimer, D.; Abad, J. Impact of shale gas development on regional water quality. *Science* **2013**, *340*, doi:10.1126/science.1235009.
7. Johnson, N.; Gagnolet, T.; Ralls, R.; Zimmerman, E.; Eichelberger, B.; Tracey, C.; Kreitler, G.; Orndorff, S.; Tomlinson, J.; Bearer, S. Pennsylvania energy impacts assessment
   report 1: Marcellus shale natural gas and wind. *Harrisburg, PA, US: The Nature
   Conservancy-Pennsylvania Chapter* **2010**. Available online: http://www.nature.org/media/pa/
   tnc_energy_analysis.pdf (Accessed 29 May 2015).
8. Stearns, M.; Tindall, J.; Cronin, G.; Friedel, M.; Bergquist, E. Effects of coal-bed methane discharge waters on the vegetation and soil ecosystem in Powder River Basin, Wyoming. *Water Air Soil Pollut.* **2005**, *168*, 33–57.
9. Wang, X.; Melesse, A.M.; McClain, M.E.; Yang, W. Water quality changes as a result of coalbed methane development in a Rocky Mountain watershed. *J. Am. Water Resour. Assoc.* **2007**, *43*, 1383–1399.
10. Mennis, J.; Hultgren, T. Intelligent dasymetric mapping and its application to areal interpolation. *Cartogr. Geogr. Inf. Sci.* **2006**, *33*, 179–194.
11. Multi Resolution Land Characteristics Consortium (MRLC). National Land Cover Database 2006 Product Legend. 2006. Available online: http://www.mrlc.gov/nlcd06_leg.php. (accessed on 19 March 2015).
12. Jin, S.; Yang, L.; Danielson, P.; Homer, C.; Fry, J.; Xian, G. A comprehensive change detection method for updating the National Land Cover Database to circa 2011. *Remote Sens. Environ.* **2013**, *132*, 159–175.
13. Vogt, P.; Riitters, K.H.; Estreguil, C.; Kozak, J.; Wade, T.G.; Wickham, J.D. Mapping spatial patterns with morphological image processing. *Landsc. Ecol.* **2007**, *22*, 171–177.
14. Soille, P.; Vogt, P. Morphological segmentation of binary patterns. *Pattern Recognit. Lett.* **2009**, *30*, 456–459.
15. USGS. Natural gas production in the United States. U.S. Department of interior, U.S. Geological Survey, Fact Sheet, fs-113-01. 2002. Available online: http://pubs.usgs.gov/fs/fs-0113-01/fs-0113-01.pdf. (Accessed 19 March 2015).

© 2015 by the authors; licensee MDPI, Basel, Switzerland. This article is an open access article distributed under the terms and conditions of the Creative Commons Attribution license (http://creativecommons.org/licenses/by/4.0/).
